# Supplementary material
Source: publisher figshare collection journal article supplement (https://acs.figshare.com/ndownloader/files/4191415)
Supplement: Supplementary file 1 [file 4191415]

**Photoinduced Electron Transfer Across a Molecular Wall: Coumarin Dyes as Donors  
and Methyl viologen and TiO<sub>2</sub> as Acceptors**

Mintu Porel,<sup>a</sup> Agnieszka Klimczak,<sup>b</sup> Marina Freitag,<sup>b</sup> Elena Galoppini<sup>b,\*</sup>  
and V. Ramamurthy<sup>a,\*</sup>

<sup>a</sup> Department of Chemistry, University of Miami, Coral Gables, FL 33124, USA

<sup>b</sup> Chemistry Department, Rutgers University, Newark, NJ 07102, USA

[murthy1@miami.edu](mailto:ramamurthy1@miami.edu); [galoppin@rutgers.edu](mailto:galoppin@rutgers.edu)

|            | <b>Content</b>                                                                                          | <b>Page #</b> |
|------------|---------------------------------------------------------------------------------------------------------|---------------|
| Figure S1  | <sup>1</sup> H NMR spectra of the C-153@OA <sub>2</sub> in presence of MV <sup>2+</sup>                 | S2            |
| Figure S2  | 2D DOSY spectrum of C-153@OA <sub>2</sub> + MV <sup>2+</sup>                                            | S3            |
| Figure S3  | Fluorescence quenching experiments of C-1@OA <sub>2</sub> with MV <sup>2+</sup>                         | S4            |
| Figure S4  | Fluorescence quenching experiments of C-480@OA <sub>2</sub> with MV <sup>2+</sup>                       | S4            |
| Figure S5  | Time resolved titration of C-153@OA <sub>2</sub> with MV <sup>2+</sup>                                  | S5            |
| Figure S6  | Time resolved titration of C-1@OA <sub>2</sub> with MV <sup>2+</sup>                                    | S5            |
| Figure S7  | Time resolved titration of C-480@OA <sub>2</sub> with MV <sup>2+</sup>                                  | S6            |
| Figure S8  | Fluorescence spectra of C-153@OA <sub>2</sub> in presence of MV <sup>2+</sup> and MV <sup>2+</sup> @CB7 | S6            |
| Figure S9  | FTIR-ATR spectra of OA                                                                                  | S7            |
| Figure S10 | Fluorescence titration experiments of C-153@OA <sub>2</sub> with ZrO <sub>2</sub>                       | S7            |
| Figure S11 | Time resolved titration of C-153@OA <sub>2</sub> with TiO <sub>2</sub> solution                         | S8            |
|            | Experimental section                                                                                    | S8            |

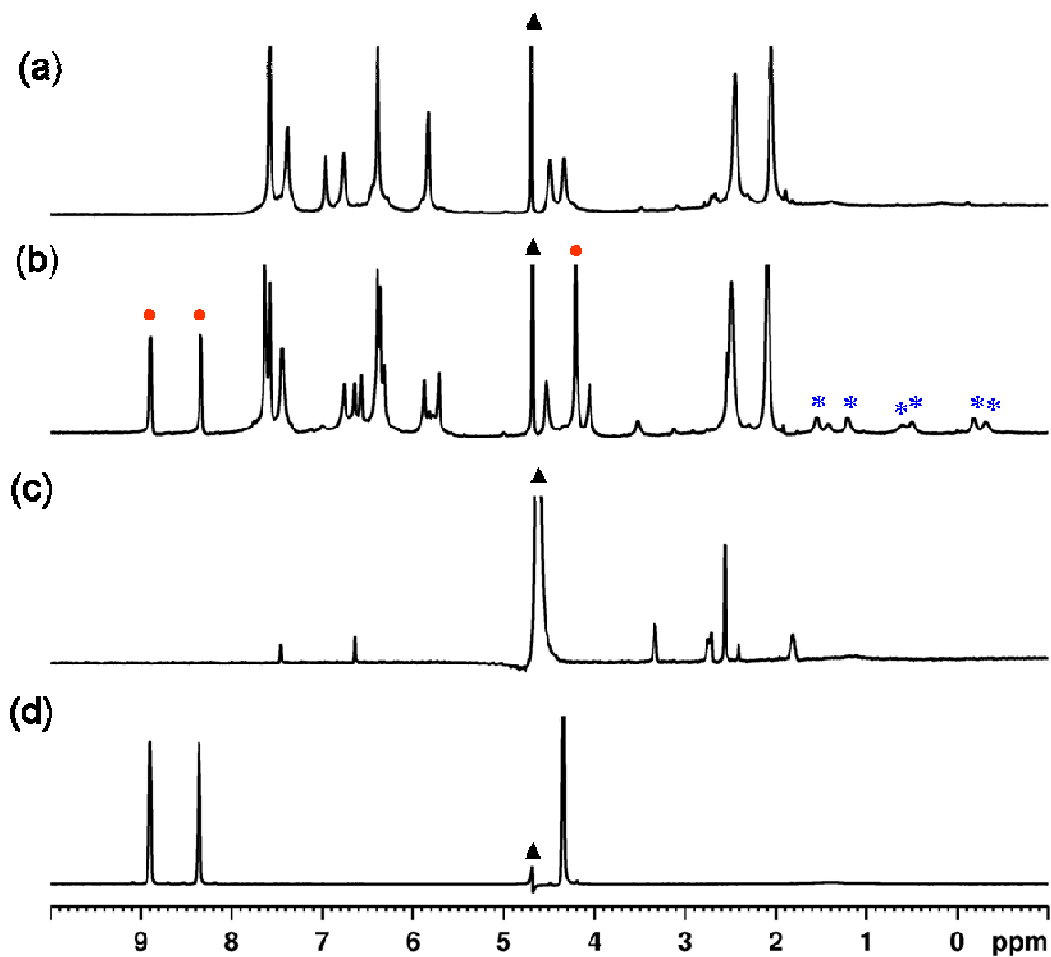

**Figure S1.**  $^1\text{H}$  NMR (500 MHz,  $\text{D}_2\text{O}$ ) spectra of (a) OA, (b) C-153@OA<sub>2</sub> + MV<sup>2+</sup>, (c) C-153 and (d) MV<sup>2+</sup>; [C-153]= 0.5 mM, [OA]=1 mM, [MV<sup>2+</sup>]= 1 mM and in 10 mM sodium tetraborate buffer; “\*”, “•” and “▲” represent bound C-153 protons, MV<sup>2+</sup> protons and residual proton signal in  $\text{D}_2\text{O}$  respectively.

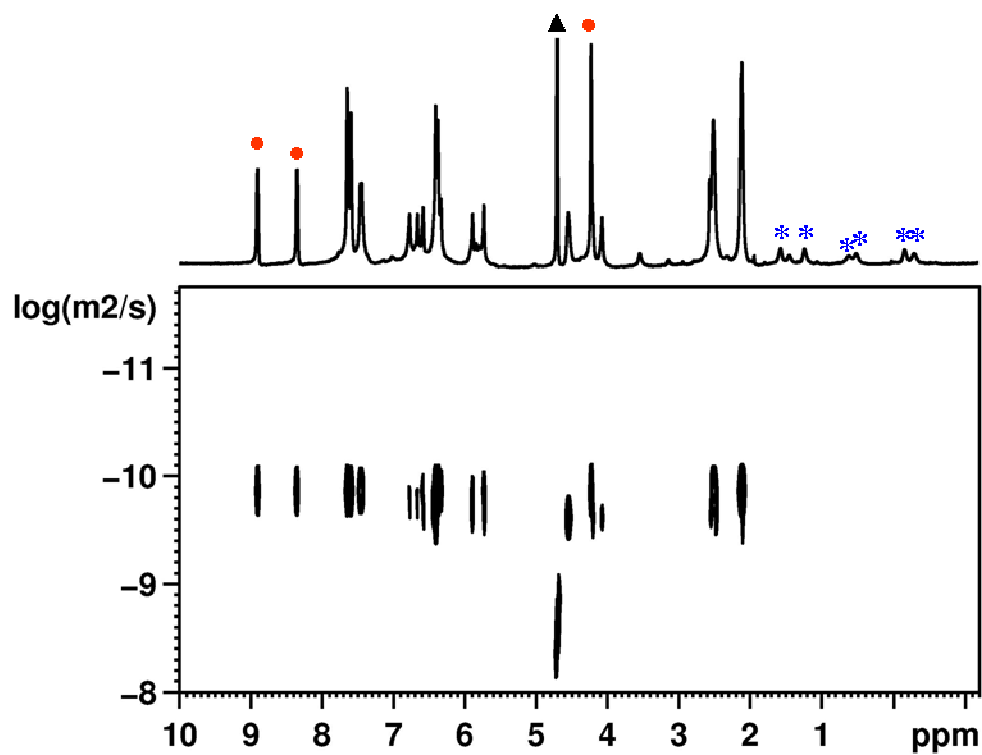

**Figure S2.** 2D DOSY (500 MHz, D<sub>2</sub>O) spectra of C-153@OA<sub>2</sub> + MV<sup>2+</sup>; [C-153]= 0.5 mM, [OA]=1 mM, [MV<sup>2+</sup>]= 1 mM; “\*” and “•” represent bound C-153 and MV<sup>2+</sup> proton signals, diffusion constant of C-153@OA<sub>2</sub> and MV<sup>2+</sup> are  $1.19 \times 10^{-6}$  cm<sup>2</sup>/s and  $1.2 \times 10^{-6}$  cm<sup>2</sup>/s respectively.

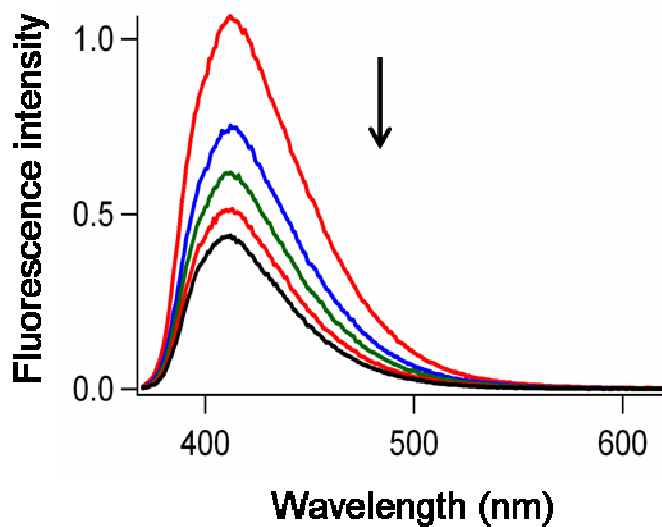

**Figure S3.** Fluorescence titration spectra of C-1@OA<sub>2</sub> with  $MV^{2+}$ ;  $\lambda_{ex} = 350$  nm; [C-1] =  $2 \times 10^{-5}$  M, [OA] =  $1 \times 10^{-4}$  M, [ $MV^{2+}$ ] =  $1.5 \times 10^{-5}$  M to  $4 \times 10^{-5}$  M in 10 mM sodium tetraborate buffer.

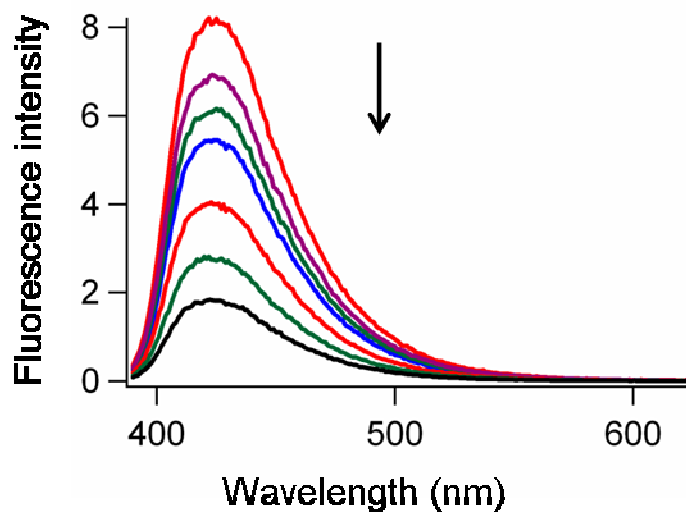

**Figure S4.** Fluorescence titration spectra of C-480@OA<sub>2</sub> with  $MV^{2+}$ ;  $\lambda_{ex} = 380$  nm; [C-480] =  $2 \times 10^{-5}$  M, [OA] =  $1 \times 10^{-4}$  M, [ $MV^{2+}$ ] =  $1.5 \times 10^{-5}$  M to  $5 \times 10^{-5}$  M in 10 mM sodium tetraborate buffer.

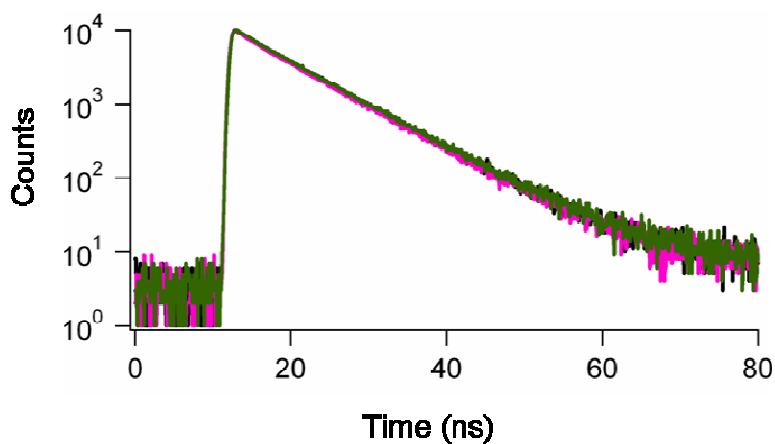

**Figure S5.** Time resolved titration spectra of C-153@OA<sub>2</sub> with MV<sup>2+</sup>;  $\lambda_{\text{ex}} = 420$  nm,  $\lambda_{\text{em}} = 480$  nm, [C-153] =  $1.5 \times 10^{-5}$  M, [OA] =  $1 \times 10^{-4}$  M and [MV<sup>2+</sup>] =  $1.5 \times 10^{-5}$  M to  $7.5 \times 10^{-5}$  M in 10 mM sodium tetraborate buffer; Lifetime  $\tau = 7.3$  ns.

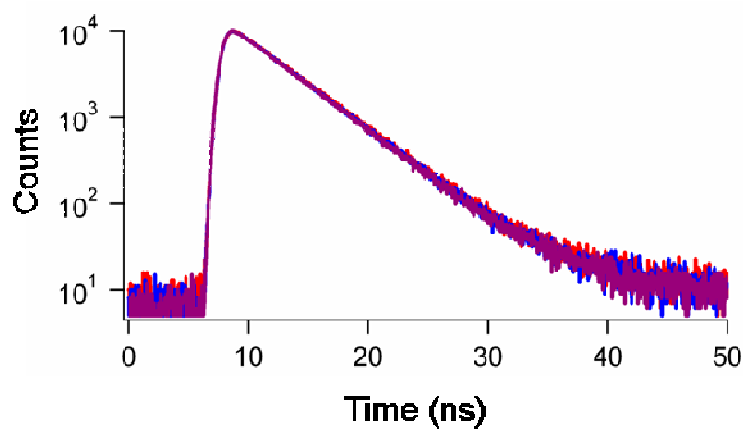

**Figure S6.** Time resolved titration spectra of C-1@OA<sub>2</sub> with MV<sup>2+</sup>;  $\lambda_{\text{ex}} = 350$  nm,  $\lambda_{\text{em}} = 412$  nm, [C-1] =  $2 \times 10^{-5}$  M, [OA] =  $1 \times 10^{-4}$  M and [MV<sup>2+</sup>] =  $1.5 \times 10^{-5}$  M to  $4 \times 10^{-5}$  M in 10 mM sodium tetraborate buffer; Lifetime  $\tau = 4.3$  ns.

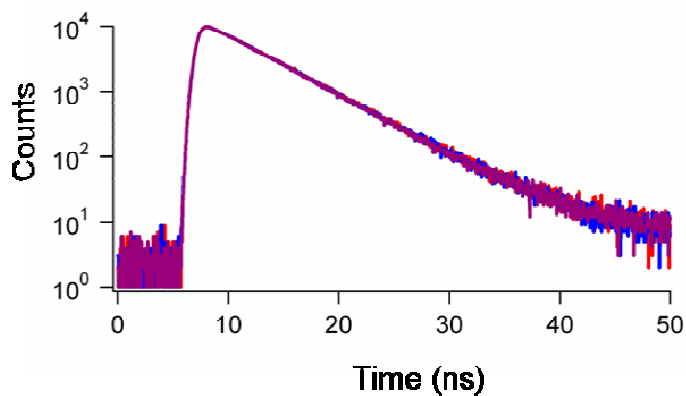

**Figure S7.** Time resolved titration spectra of C-480@OA<sub>2</sub> with MV<sup>2+</sup>;  $\lambda_{\text{ex}} = 380 \text{ nm}$ ,  $\lambda_{\text{em}} = 435 \text{ nm}$ , [C-480] =  $2 \times 10^{-5} \text{ M}$ , [OA] =  $1 \times 10^{-4} \text{ M}$  and [MV<sup>2+</sup>] =  $1.5 \times 10^{-5} \text{ M}$  to  $5 \times 10^{-5} \text{ M}$  in 10 mM sodium tetraborate buffer; Lifetime  $\tau = 4.7 \text{ ns}$ .

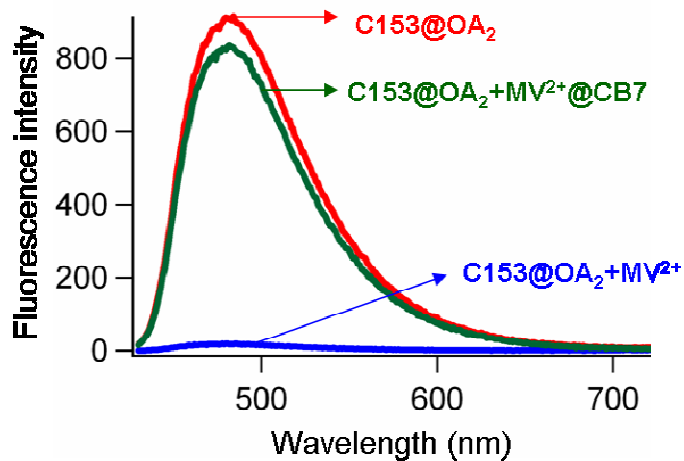

**Figure S8.** Fluorescence spectra of C-153@OA<sub>2</sub> in presence of MV<sup>2+</sup> and MV<sup>2+</sup>@CB7,  $\lambda_{\text{ex}} = 420 \text{ nm}$ ; [C-153] =  $1.5 \times 10^{-5} \text{ M}$ , [OA] =  $1 \times 10^{-4} \text{ M}$  and [MV<sup>2+</sup>] =  $7.5 \times 10^{-5} \text{ M}$  and [CB7] =  $7.5 \times 10^{-5} \text{ M}$  in 10 mM sodium tetraborate buffer.

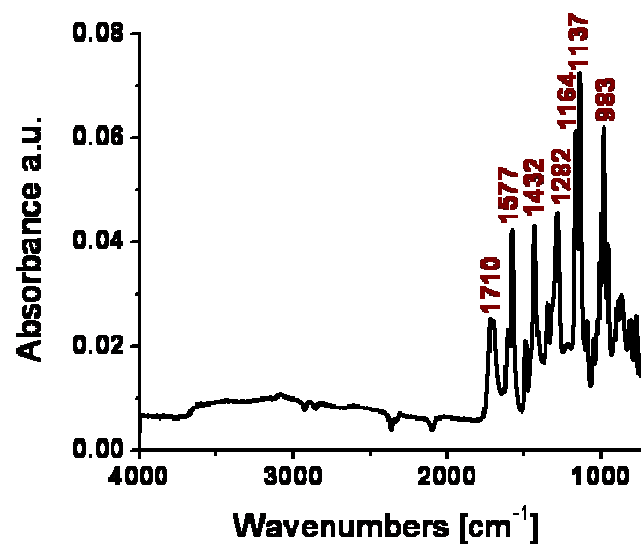

**Figure S9.** FTIR-ATR spectra of OA (solid)

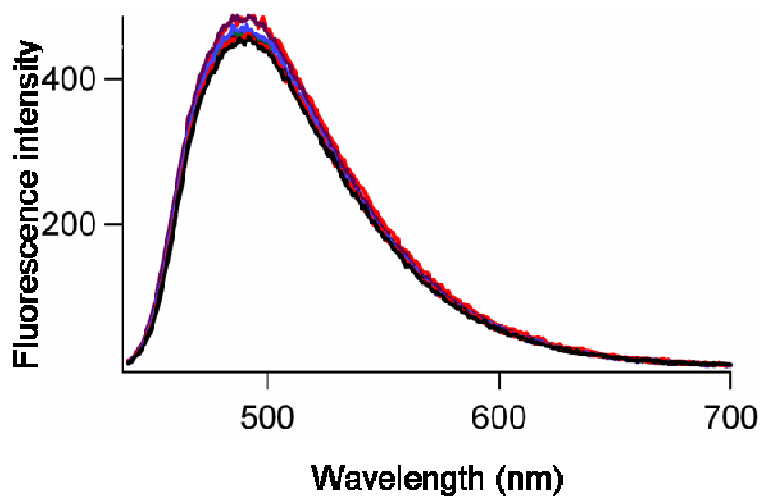

**Figure S10.** Fluorescence titration spectra of C-153@OA<sub>2</sub> with ZrO<sub>2</sub> colloidal solution;  $\lambda_{\text{ex}} = 440 \text{ nm}$ ;  $[\text{C-153}] = 1.5 \times 10^{-5} \text{ M}$ ,  $[\text{OA}] = 1 \times 10^{-4} \text{ M}$  in water.

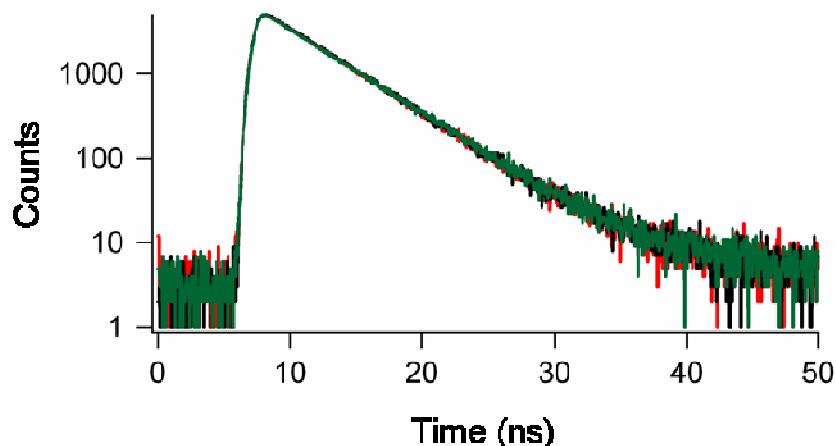

**Figure S11.** Time resolved titration spectra of C-153@OA<sub>2</sub> with TiO<sub>2</sub> solution;  $\lambda_{\text{ex}} = 440$  nm,  $\lambda_{\text{em}} = 480$  nm, [C-153] =  $1.5 \times 10^{-5}$  M and [OA] =  $1 \times 10^{-4}$  M in water; Lifetime  $\tau = 7.3$  ns.

### Experimental Section

*Material:* The hosts octa acid<sup>1</sup>, cucurbit[7]uril<sup>2</sup> were synthesized following published procedures. Laser grade coumarin 153 (C-153), coumarin 1 (C-1) and coumarin 480 (C-480) were used as received from Sigma-Aldrich/Acros.

#### *General protocol for NMR study*

<sup>1</sup>H NMR studies were carried out on a Bruker 500 MHz NMR spectrometer at 25 °C. 600  $\mu$ L of a D<sub>2</sub>O solution of host OA (1mM OA in 10 mM Na<sub>2</sub>B<sub>4</sub>O<sub>7</sub>) was taken in a NMR tube and to this 0.5 equivalent increments of coumarin (5  $\mu$ L of a 60 mM solution in DMSO-*d*<sub>6</sub>) was added. The <sup>1</sup>H NMR experiments were carried out after shaking the NMR tube for 5 min after addition. Completion of complexation was monitored by the disappearance of the free host OA signals upon addition of guest. The required amount of quencher solution (MV<sup>2+</sup>; stock solutions of 30 mM were prepared in D<sub>2</sub>O) was added and <sup>1</sup>H NMR was recorded after shaking the NMR tube for 5 min. For experiments in the presence of CB7, the calculated amount of CB7 (solid) was added to coumarin@OA<sub>2</sub> + quencher solutions and shaken properly before <sup>1</sup>H NMR spectra were recorded.



#### *General protocol for fluorescence study*

Fluorescence emission spectra were recorded on a FS920CDT Edinburgh steady-state fluorimeter and the lifetime measurements on FL900CDT fluorescence lifetime spectrometer. A 30 mM stock solution of the guest was prepared in  $\text{CHCl}_3$ . The host (OA) aqueous solution was prepared in 10 mM sodium tetraborate buffer (1 mM). The complex solutions were prepared by adding required amount of guest solution in a vial, evaporating the solvent, and adding to the vial 2.5 mL of the host solution. The resulting aqueous solution was sonicated for 30 min. Calculated amounts of quencher solution (aqueous  $\text{MV}^{2+}$  solution,  $\text{TiO}_2$  and  $\text{ZrO}_2$  colloidal solution) were added and mixed thoroughly and then the fluorescence spectra were recorded. The required amount of CB7 was added to the solution (host/guest +  $\text{MV}^{2+}$ ), sonicated and fluorescence spectra were recorded.

#### *pH adjustment*

Capsular assembly ( $\text{C-153@OA}_2$ ) was made in sodium tetraborate buffer (pH~9) and its emission was recorded. At each step of the acid-titration, aqueous HCl was added drop wise and pH of the solution was checked. After adjusting a certain pH, emission of the solution was recorded. It was observed that upto pH~7,  $\lambda_{\text{max}}$  of complex emission remain almost same. From pH=7,  $\lambda_{\text{max}}$  was gradually red shifted with increasing pH of the solution indicating that C-153 was decomplexing from OA capsule. Depending upon this result pH of  $\text{C-153@OA}_2$  was fixed at 7 for binding study with  $\text{TiO}_2$ .

#### *Mesoporous metal oxide film preparation and binding*

Binding was done on semiconducting  $\text{TiO}_2$  ( $E_b = 3.2$  eV) films, as well as insulating  $\text{ZrO}_2$  ( $E_b = 5$  eV) films to study excited states. Synthesis of  $\text{TiO}_2$  /  $\text{ZrO}_2$  nanoparticles were carried out by acidic hydrolysis of titanium(IV) iso-propoxide and zirconium(IV) propoxide under nitrogen atmosphere and autoclaved at 200 °C for 8 hours as previously described<sup>3,4</sup>. Poly(ethylene glycol) (PEG 2,000) was added (6g/L) to the colloidal pastes of  $\text{TiO}_2$ /  $\text{ZrO}_2$  to optimize the solution viscosity of the pastes. The pastes were applied to a micro cover glass (VWR) or a conductive glass (FTO, TEC 7 by Pilkington, with 8 – 10

$\Omega/\text{sq}$  resistance of the sheet). The  $\text{TiO}_2$  /  $\text{ZrO}_2$  pastes were spread on a conductive glass by using a glass test tube and holding the edge of a conductive glass by the tape. The films were air dried and then sintered in the oven at  $450\text{ }^\circ\text{C}$  for 30 minutes under oxygen flow. Then, the films were cooled down before using, or stored in a desiccator in dark.

The binding of  $\text{C153@OA}_2$  complexes onto  $\text{TiO}_2$  and  $\text{ZrO}_2$  films was performed by immersing the  $\text{MO}_n$  films in 1 mM aqueous solutions of the complex overnight in the dark. The functionalized films were rinsed with water, dried, and then used for the spectroscopic measurements.

#### *General protocol for FTIR-ATR study of the films*

All FTIR-ATR spectra for OA (soild) and  $\text{C-153@OA}_2$  (at  $\text{pH}=7$ ) on  $\text{TiO}_2/\text{ZrO}_2$  films were recorded on a Thermo Scientific, Nicolet 6700Ft-IR. The films were dried by heating in the oven to  $110\text{ }^\circ\text{C}$  for 30 minutes before all measurements.

#### *General protocol for emission study of the films*

Fluorescence emission spectra of the  $\text{C-153@OA}_2$  (at  $\text{pH}=7$ ) binding on  $\text{TiO}_2/\text{ZrO}_2$  films were collected on a Cary Eclipse, Varian fluorescence spectrometer. The fluorescence spectra were recorded at  $\lambda_{\text{ex}} = 420\text{ nm}$ . Before the spectroscopic measurements all films were heated in the oven to  $110\text{ }^\circ\text{C}$  for 30 minutes to remove moisture.

## **Reference**

- <sup>1</sup> Gibb, C. L. D.; Gibb, B. C. *J. Am. Chem. Soc.* **2004**, *126*, 11408.
- <sup>2</sup> Day, A; Arnold, A. P.; R. Blanch, J.; Snushall, B. *J. Org. Chem.* **2001**, *66*, 8094.
- <sup>3</sup> Taratula, O.; Wang, D.; Chu D.; Galoppini, E.; Zhang Z.; Chen, H.; Saraf, G; Lu, Y; *J. Phys. Chem. B*, **2006**, *110*, 6506-6515.
- <sup>4</sup> Rochford, J.; Chu, D.; Hagfeldt, A.; Galoppini, E.; *J. Am. Chem. Soc.*, **2007**, *129*, 4655.
